# Supplementary material for: LDL-lowering therapy and the risk of prostate cancer: a meta-analysis of 6 randomized controlled trials and 36 observational studies
Source: PubMed Central journal article supplement (PMC4830970; doi:10.1038/srep24521), 2016-04-14

## Supplementary Files:

LDL-lowering therapy and the risk of prostate cancer: a meta-analysis of 6 randomized controlled trials and 36 observational studies

Ping Tan, MD <sup>a, b</sup>, Shiyou Wei, MD <sup>c</sup>, Zhuang Tang, MD <sup>a, b</sup>, Liang Gao, MD <sup>a, b</sup>,  
Chen Zhang, MD <sup>d</sup>, Pan Nie, MD <sup>e</sup>, Lu Yang, PhD <sup>a, b, \*</sup>, Qiang Wei, PhD <sup>a, b, \*</sup>

## Files Legends

TABLE S1. Characteristics of 23 Cohort Studies and 6 RCTs Included in the Meta-analysis.

TABLE S2. Characteristics of 13 Case-control Studies Included in the Meta-analysis.

Figure S1. Statins use and risk of localized prostate cancer.

Figure S2. Statins use and risk of high-grade prostate cancer.

Figure S3. Statins use and risk of low-grade prostate cancer.

Figure S4. Short-term statins use and risk of total prostate cancer.

TABLE S1. Characteristics of 23 Cohort Studies and 6 RCTs Included in the Meta-analysis.

| Author, year(country)                                    | Study period(y) | PCa* cases(N)/<br>Statin group(N) | PCa cases(N)/<br>Control group(N) | Mean follow-<br>up | Description<br>of exposure | Information<br>source | Quality<br>score |
|----------------------------------------------------------|-----------------|-----------------------------------|-----------------------------------|--------------------|----------------------------|-----------------------|------------------|
| Nordstrom et al. 2015(Sweden)                            | 6(2007-2012)    | 2321/4825                         | 5233/11923                        | NR <sup>5</sup>    | e                          | B                     | 8                |
| Platz et al.2014(U.S.)                                   | 9(1994-2003)    | 95/2249                           | 422/7208                          | >7y                | a                          | A                     | 6                |
| Morote et al.2014(Mediterranean)                         | 6(2006-2011)    | 232/744                           | 616/1664                          | NR                 | a                          | A                     | 6                |
| Chen-Pin et al. 2014 (U.S.)                              | 10(2003-2013)   | 3756/71999 <sup>1</sup>           |                                   | 6.4y               | c                          | C                     | 8                |
| Lustman et al.2013(Israel)                               | 9(2001-2009)    | 399/37645                         | 990/29096                         | NR                 | d                          | B                     | 8                |
| Freedland et al. 2013 (U.S.)                             | NR              | 1517/6729 <sup>2</sup>            |                                   | 4y                 | a                          | A                     | 5                |
| Lehman et al. 2012 (U.S.)                                | 6(1999-2005)    | 152/2937                          | 208/2105                          | 5.2y               | c                          | C                     | 7                |
| Chan et al. 2012 (U.S.)                                  | 8(2000-2008)    | 116/1377                          | 240/3692                          | 7y                 | c                          | A                     | 6                |
| Tan et al.2011(U.S.)                                     | 10(2000-2010)   | 565/1022                          | 1842/3182                         | NR                 | e                          | B                     | 6                |
| Jacobs et al.2011(U.S.)                                  | 10(1997-2007)   | 824/7169                          | 3089/45343                        | NR                 | g                          | A                     | 7                |
| Fowke et al. 2011(U.S.)                                  | 8(2002-2010)    | 319/783                           | 525/1365                          | NR                 | c                          | A                     | 7                |
| Farwell et al. 2011(England)                             | 11(1997-2007)   | 359/41078                         | 187/14797                         | 5.6y               | f                          | B                     | 8                |
| Murtola et al.2010(Finland)                              | 9(1996-2004)    | 268/6692                          | 1326/16516                        | 6.92y              | a                          | C                     | 8                |
| Hippisley et al. 2010(England & Wales)                   | 6(2002-2008)    | 7129/990495 <sup>2</sup>          |                                   | NR                 | b                          | B                     | 7                |
| Haukka et al. 2010(Finland)                              | 10(1996-2005)   | 562/5871                          | 489/5057                          | 3.06y              | b                          | C                     | 8                |
| Breau et al. 2010(U.S.)                                  | 18(1990-2007)   | 38/634                            | 186/1813                          | 15.7y              | b                          | A                     | 7                |
| Smeeth et al.2008(U.K.)                                  | 12(1995-2006)   | 312/65517                         | 3213/299158                       | 4.4y               | b                          | B                     | 8                |
| Friedman et al. 2008(U.S.)                               | 9(1994-2003)    | 1706/192598                       | NR/1904876                        | 4.91y              | d                          | B                     | 7                |
| Boudreau et al.2008(U.S.)                                | 15(1990-2005)   | 246/12013                         | 2286/71359                        | 3.3y               | e                          | C                     | 7                |
| Flick et al. 2007(U.S.)                                  | 15(1991-2005)   | 270/22903                         | 618/46144                         | 8.8y               | e                          | B                     | 7                |
| Platz et al. 2006(U.S.)                                  | 12(1990-2002)   | 322/334702 <sup>#</sup>           | 2257/42237 <sup>#</sup>           | NR                 | a                          | A                     | 7                |
| Friis et al. 2005 (Denmark)                              | 13 (1989-2002)  | 34/6935                           | 1373/160491                       | 3.3y               | i                          | C                     | 6                |
| Lovastatin study groups 1993 (U.S.,<br>Canada & Finland) | NR              | 5/504 <sup>4</sup>                |                                   | 4.8y               | j                          | A                     | 7                |
| Ford et al.2007(Scotland)                                | 15(1989-2004)   | 89/3291                           | 59/3286                           | 13.2y              | h                          | B                     | 7                |
| HPSC. 2005(U.K.)                                         | NR              | 145/7727                          | 145/7727                          | 5y                 | k                          | B                     | 5                |
| 4S Group 2004 (Multicenter)                              | NR              | 51/1814                           | 55/1803                           | 10y                | k                          | B                     | 7                |
| The LIPID Study Group. 2002(Multicenter)                 | 2(1990-1992)    | 148/3756                          | 145/3742                          | 8.0y               | h                          | B                     | 4                |
| Serruys et al.2002(Multicenter)                          | 5(1996-2001)    | 2/844                             | 2/833                             | 3.9y               | l                          | B                     | 5                |
| Downs et al.1998(U.S.)(AFCAPS)                           | 7(1990-1997)    | 109/2805                          | 108/2803                          | 5.2y               | m                          | B                     | 5                |

\* PCa, prostate cancer; \$ NR, not reported; # Person-years at risk. A total of 34989 males in statin and control group.

1, a total of 3756 patients diagnosed with PCa in 71999 males during study period; 2, a total of 1517 patients diagnosed with PCa in 6729 males during study period; 3, a total of 5 patients diagnosed with PCa in 504 males during study period; 4, a total of 7129 patients diagnosed with PCa in 990495 males during study period.

A, self-reported; B, medical records; C, prescription database.

a, current use of statins vs. no use of statin; b, current use of statins vs. no current use of statins; c, use of statins vs. no use of statins; d, any use of statins vs. no use of statins; e, ever use of statins vs. no use of statins; f, use of statins vs. use of anti-hypertensives; g, current use of cholesterol-lowering drugs vs. never use of cholesterol-lowering drugs; h, use of pravastatin vs. placebo; i, use of statins vs. non-statin lipid-lowering drugs; j, a systematic use of lovastatin vs. SEER data; k, use of simvastatin vs. placebo; l, use of fluvastatin vs. placebo; m, use of lovastatin vs. placebo ;

TABLE S2. Characteristics of 13 Case-control Studies Included in the Meta-analysis.

| Author, year(country)            | Study period(y) | Statin users (N)/<br>Cases(N) <sup>*</sup> | Statin users (N)/<br>Controls(N) | Mean<br>follow-up | Description<br>of exposure | Information<br>source | Quality<br>score     |
|----------------------------------|-----------------|--------------------------------------------|----------------------------------|-------------------|----------------------------|-----------------------|----------------------|
| Olivan et al.2015(Mediterranean) | 6(2006-2011)    | 152/440                                    | 552/1504                         | NR <sup>§</sup>   | a                          | NR                    | 4                    |
| Leung et al. 2013 (China)        | 8(2000-2008)    | 26/231                                     | 2815/29974                       | 4y                | c                          | C                     | 5                    |
| Jespersen et al.2013(Denmark)    | 13(1997-2010)   | 7125/41690                                 | 35485/208501                     | NR                | a                          | C                     | 7                    |
| Vinogradova et al.2011(U.K.)     | 10(1998-2008)   | 2774/14764                                 | 11508/61853                      | 28m               | c                          | C                     | 7                    |
| Chang et al.2011(Taiwan)         | 4(2005-2008)    | 83/ 388                                    | 239/1552                         | NR                | e                          | C                     | 6                    |
| Coogan et al.2010(U.S.)          | 16(1992-2008)   | 250/1367                                   | 178/2007                         | NR                | d                          | A                     | 3                    |
| Agalliu et al.2008(U.S.)         | 4(2002-2005)    | 272/1001                                   | 244/942                          | NR                | a                          | A                     | 5                    |
| Murtola et al.2007(Finland)      | 7(1995-2002)    | 2622/24723                                 | 2439/24723                       | NR                | e                          | C                     | 6                    |
| Singal et al.2005(U.S.)          | 6( 1998-2004)   | 159874/443805 <sup>1</sup>                 |                                  | NR                | c                          | C                     | Unclear <sup>#</sup> |
| Shannon et al. 2005 (U.S.)       | 7 (1997-2004)   | 34/100                                     | 99/202                           | NR                | c                          | C                     | 4                    |
| Kaye 2004 (U.K.)                 | 12 (1990–2002)  | 62/569                                     | 204/2488                         | 6.4y              | a                          | C                     | 6                    |
| Graaf et al. 2004 (Netherlands)  | 4 (1995–1998)   | NR/186                                     | NR                               | 7.2y              | a                          | C                     | 8                    |
| Blais et al. 2000 (Canada)       | 6 (1988–1994)   | NR/78                                      | NR/780                           | 2.7y              | n                          | A                     | 6                    |

<sup>#</sup> Singal et al. is an abstract of ASCO Annual Meeting Proceedings

<sup>\*</sup> cases, prostate cancer cases.

<sup>§</sup> NR, not reported

<sup>1</sup>, a total of 26139 were diagnosed with prostate cancer.

A, self-reported; B, medical records; C, prescription database.

a, current use of statins vs. no use of statin; b, current use of statins vs. no current use of statins; c, use of statins vs. no use of statins; d, any use of statins vs. no use of statins; e, ever use of statins vs. no use of statins; f, use of statins vs. use of anti-hypertensives; g, current use of cholesterol-lowering drugs vs. never use of cholesterol-lowering drugs; h, use of pravastatin vs. placebo; i, use of statins vs. non-statin lipid-lowering drugs; j, a systematic use of lovastatin vs. SEER data; k, use of simvastatin vs. placebo; l, use of fluvastatin vs. placebo; m, use of lovastatin vs. placebo; n, any use of statin vs. use of bile acid-binding resins.

Figure S1. Statins use and risk of localized prostate cancer.

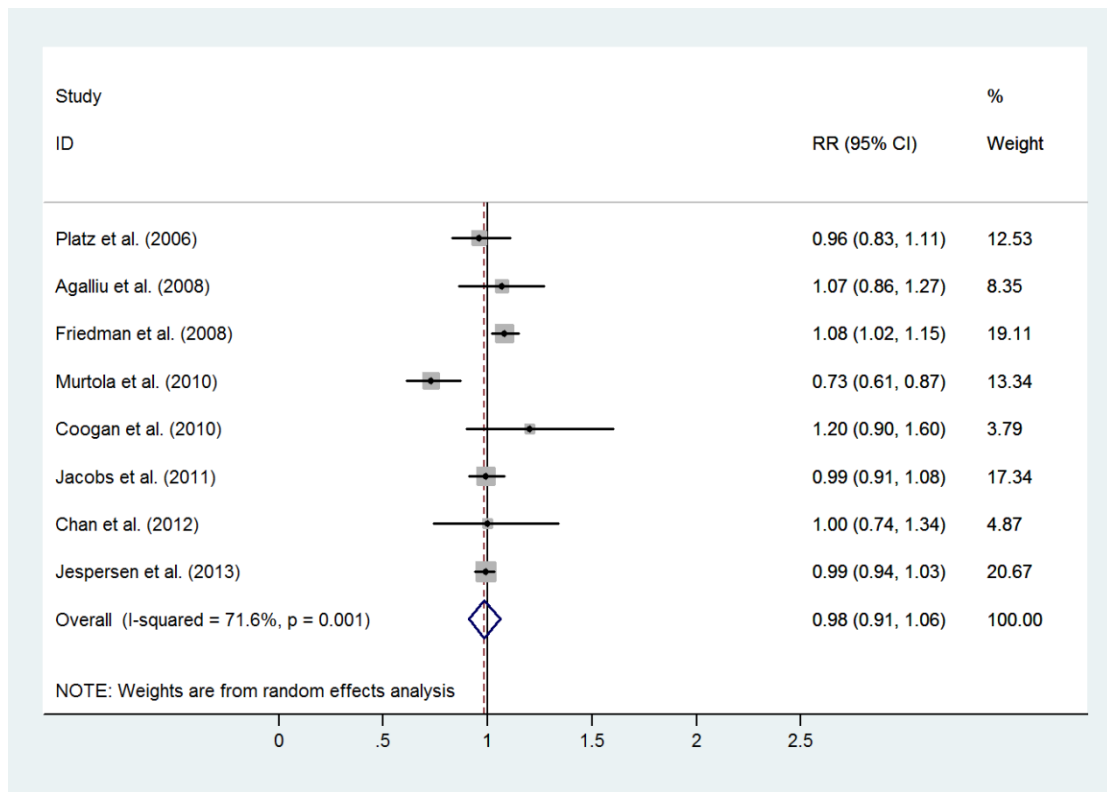

Figure S2. Statins use and risk of high-grade prostate cancer.

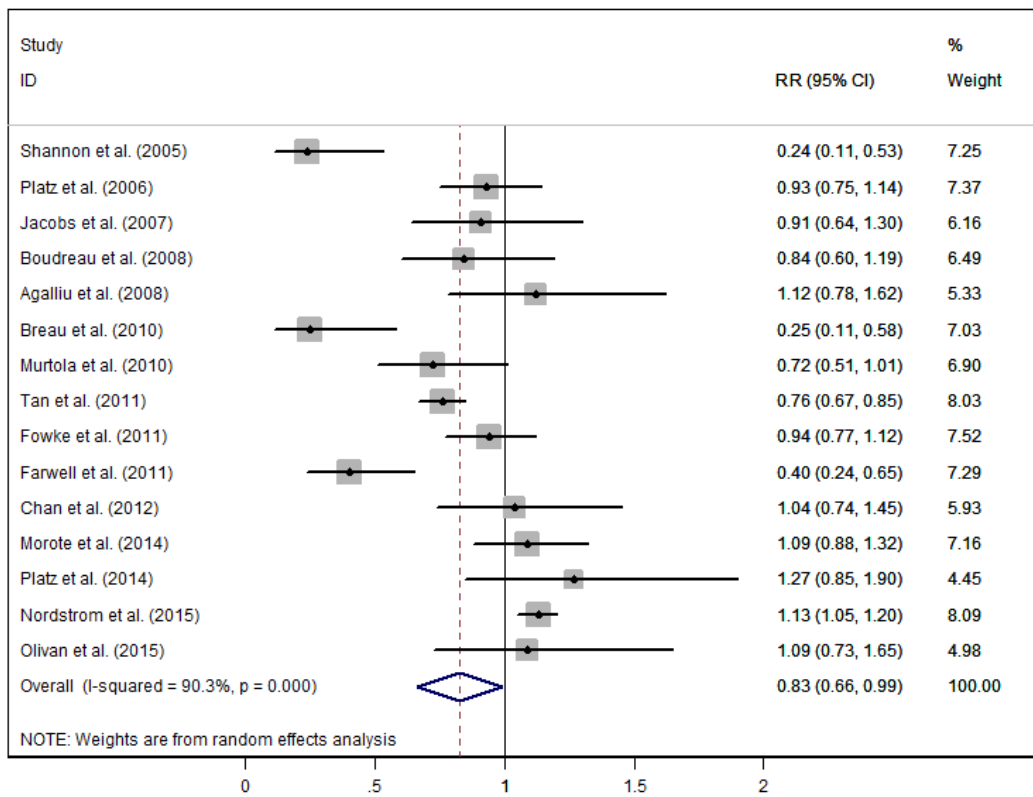

Figure S3. Statins use and risk of low-grade prostate cancer.

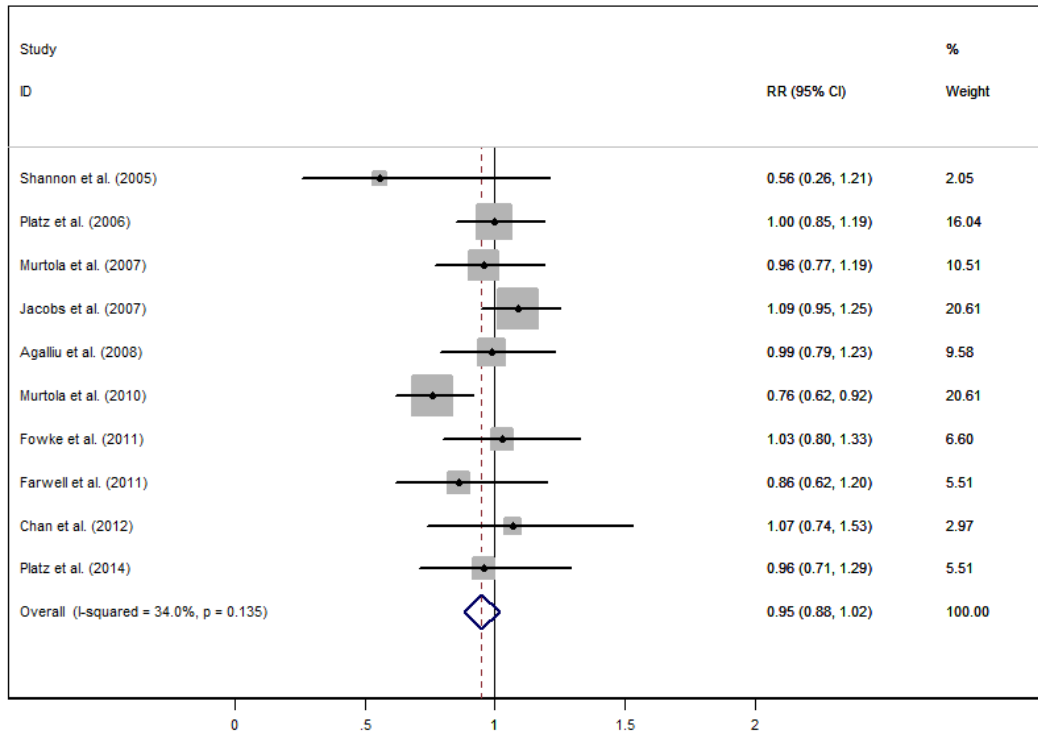

Figure S4. Short-term statins use and risk of total prostate cancer.

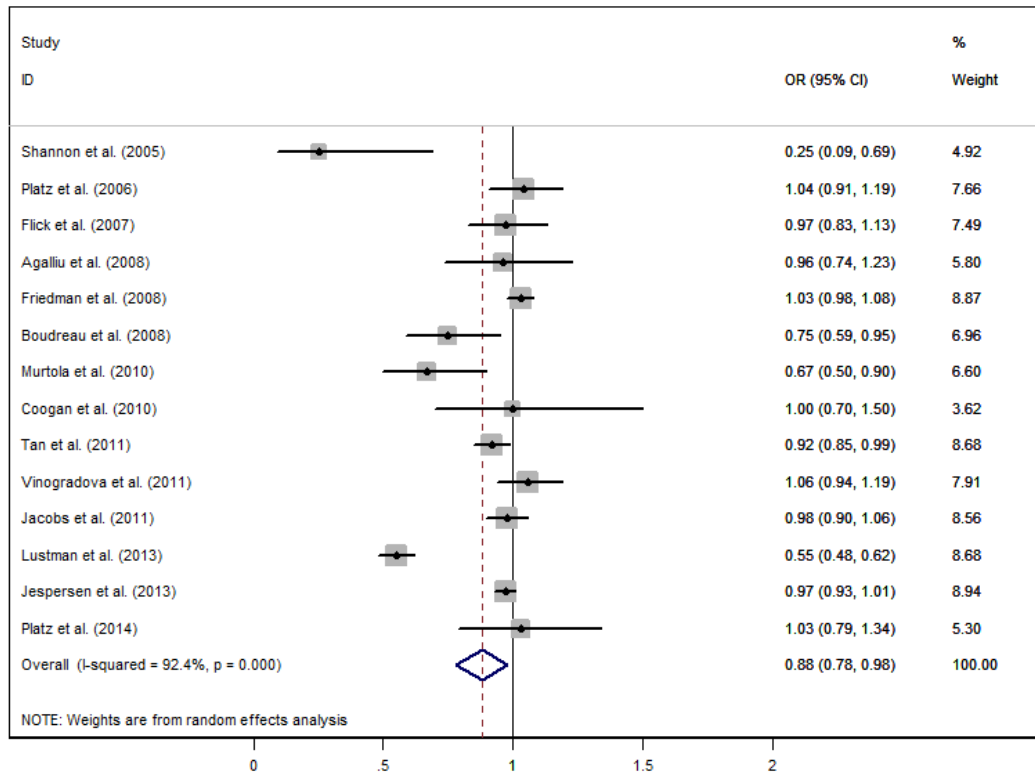

Supplement: srep24521-s1.pdf [file srep24521-s1.pdf]
